# Supplementary material for: rNAV 2.0: a visualization tool for bacterial sRNA-mediated regulatory networks mining
Source: Springer Nature journal article supplement (doi:10.1186/s12859-017-1598-8), 2017-03-23
Supplement: 12859_2017_1598_MOESM1_ESM.pdf [file 12859_2017_1598_MOESM1_ESM.pdf]

## Data material

In the following, we give further explanations about the filtering steps used to perform the analysis of the case study.

### **1- The sRNA-mediated regulatory network of *Escherichia coli***

More than 80 small RNAs have been experimentally identified within *Escherichia coli* including a large set of sRNAs that are playing regulatory functions, by base-pairing 5' UTR mRNA regions. In this context, we performed an analytical strategy based on the sRNA-mediated regulatory network with the two sRNAs, FnrS and RyhB, which are both multi-targeting mRNAs with validated common targets.

### **2- The construction of the network**

We constructed the network using rNAV derived from both :

- A sRNA multi-fasta file
  - **FnrS (ecocyc accession number: G0-8872)** is involved in the regulation of enzymes required in the aerobic-anaerobic transition when the cell is undergoing an oxidative stress (Durand *et al*, 2010).

```
>fnrS
GCAGGTGAATGCAACGTCAAGCGATGGGCGTTGCGCTCCATATTGTCTTACTTCCTTTTTTGAATTACT
GCATAGCACAATTGATTTCGTACGACGCCGACTTTGATGAGTCGGCTTTTTTTTT
```
  - **RyhB (ecocyc accession number: G0-10677)**: its expression is induced by a low level of iron, is known to interact with iron-containing enzymes and iron transport and storage proteins (Massé *et al*, 2007 ).

```
>ryhB
GCGATCAGGAAGACCCTCGCGGAGAACCTGAAAGCACGACATTGCTCACATTGCTTCCAGTATTACTTA
GCCAGCCGGGTGCTGGCTTTT
```
- An EMBL file for genome of *Escherichia coli* (**Accession number: U00096**), using adjustable parameters for the 5' UTR extraction (as parameters, we extracted regions located 70/+5 from the AUG start codon) of each mRNA sequences.

Then, interactions were computed with IntaRNA (seed = 6) through rNAV and the enrichment was performed using the DAVID web-services.
