# Supplementary material for: rNAV 2.0: a visualization tool for bacterial sRNA-mediated regulatory networks mining
Source: Springer Nature journal article supplement (doi:10.1186/s12859-017-1598-8), 2017-03-23
Supplement: 12859_2017_1598_MOESM2_ESM.pdf [file 12859_2017_1598_MOESM2_ESM.pdf]

|                                                  |                             |                                                                                | <b>RNAV 1.0</b>  | <b>RNAV 2.0</b>  | <b>CytoScope</b> |  |
|--------------------------------------------------|-----------------------------|--------------------------------------------------------------------------------|------------------|------------------|------------------|--|
| <b>Visualization</b>                             |                             | Node-link diagram                                                              | -                | -                | -                |  |
|                                                  |                             | Exploration tree view                                                          | -                | -                | N.A.             |  |
|                                                  |                             | multiple linked views                                                          | -                | -                | -                |  |
|                                                  |                             | interacting regions of an RNA                                                  | -                | -                | N.A.             |  |
| <b>Interaction tools</b>                         |                             | Box-selection                                                                  | -                | -                | -                |  |
|                                                  |                             | Zoom-and-pan                                                                   | -                | -                | -                |  |
|                                                  |                             | Dedicated Neighborhood:<br>Neighborhood highlight<br>RNA region selection      | -<br>-<br>-      | -<br>-<br>-      | N.A.<br>N.A.     |  |
|                                                  |                             | Dedicated layered                                                              | -                | N.A.             | -                |  |
| <b>Algorithms</b>                                | <b>Layout</b>               | Circular                                                                       | -                | -                | -                |  |
|                                                  |                             | Force-directed                                                                 | -                | -                | -                |  |
|                                                  |                             | (Fast) Multiscale force-directed                                               | -                | -                | -                |  |
|                                                  | <b>Filter</b>               | RNAs from their clusters according to                                          |                  |                  |                  |  |
|                                                  |                             | Cluster interaction region length                                              | N.A.             | -                | N.A.             |  |
|                                                  |                             | Number of interactions within the cluster                                      | N.A.             | -                | N.A.             |  |
|                                                  |                             | Database annotations                                                           | -                | -                | -                |  |
|                                                  | <b>Coloration</b>           | From a selection :                                                             |                  |                  |                  |  |
|                                                  |                             | Extract (create a subgraph)                                                    | -                | -                | -                |  |
|                                                  |                             | Reachable network                                                              | -                | -                | -                |  |
|                                                  |                             | Shortest path                                                                  | -                | -                | -                |  |
|                                                  | <b>Computation</b>          | Motifs :                                                                       |                  |                  |                  |  |
|                                                  |                             | DOR                                                                            | N.A.             | -                | N.A.             |  |
|                                                  |                             | SIM-like                                                                       | N.A.             | -                | N.A.             |  |
|                                                  |                             | Extract from RNA name                                                          | -                | -                | -                |  |
|                                                  | <b>Input Data</b>           | According to numerical values :                                                |                  |                  |                  |  |
| Pvalue/Similarity/Energy                         |                             | -                                                                              | -                | -                |                  |  |
| Computed metric                                  |                             | -                                                                              | -                | -                |                  |  |
| Interaction region                               |                             | -                                                                              | -                | N.A.             |                  |  |
| <b>Other Features</b>                            | <b>Rendering Parameters</b> | Edges :                                                                        |                  |                  |                  |  |
|                                                  |                             | Pvalue/Similarity/Energy                                                       | Pvalue           | -                | -                |  |
|                                                  | <b>Algorithm Pipelines</b>  | Nodes :                                                                        |                  |                  |                  |  |
|                                                  |                             | Type of RNA<br>Node degree<br>Node eccentricity<br>Node betweenness centrality | -<br>-<br>-<br>- | -<br>-<br>-<br>- | -<br>-<br>-<br>- |  |
| <b>Input Data</b>                                | <b>Data format</b>          | Interaction clustering for each RNA based on :                                 |                  |                  |                  |  |
|                                                  |                             | Annotations                                                                    | N.A.             | -                | N.A.             |  |
|                                                  |                             | Interacting regions                                                            | -                | -                | N.A.             |  |
|                                                  | <b>Prediction tools</b>     | Metrics :                                                                      |                  |                  |                  |  |
| Degree<br>Eccentricity<br>Betweenness centrality |                             | -<br>-<br>-                                                                    | -<br>-<br>-      | -<br>-<br>-      |                  |  |
| <b>Input Data</b>                                | <b>Prediction tools</b>     | Enrichment analysis                                                            | N.A.             | -                | -                |  |
|                                                  |                             | rNAV files                                                                     | -                | -                | Not Applicable   |  |
|                                                  |                             | CSV files (for nodes and edges)                                                | -                | -                | -                |  |
|                                                  |                             | Genome (embl) & Fasta (sRNA sequences)                                         | N.A.             | -                | -                |  |
| <b>Other Features</b>                            | <b>Rendering Parameters</b> | Ssearch                                                                        | N.A.             | -                | -                |  |
|                                                  |                             | IntaRNA                                                                        | N.A.             | -                | -                |  |
|                                                  |                             | Show/Hide node and edge labels                                                 | -                | -                | -                |  |
|                                                  |                             | Select property to be displayed as labels                                      | -                | -                | -                |  |
| <b>Other Features</b>                            | <b>Rendering Parameters</b> | Change label sizes                                                             | -                | -                | -                |  |
|                                                  |                             | Change node sizes                                                              | -                | -                | -                |  |
|                                                  |                             | Enable/Disable animation during transitions                                    | N.A.             | -                | N.A.             |  |
|                                                  |                             | Edit/save/Re-use algorithm pipelines                                           | N.A.             | -                | N.A.             |  |

List of the main features supported by rNAV 2.0 in comparison to its prototypical version (rNAV 1.0) and, to Cytoscape [11] and its available plugins (e.g. ReNE[12], Bingo[13] or ClueGO[14]). In this table, N.A. stands for Not Available.
